# Supplementary material for: Prevalence of Genetically Associated Dilated Cardiomyopathy: A Systematic Literature Review and Meta-Analysis
Source: PubMed Central journal article supplement — Cardiol Res. 2024 Aug 15;15(4):233–45. doi: 10.14740/cr1680 (PMC11349141; doi:10.14740/cr1680), 2024-08-15
Supplement: cr-15-233-s001.pdf [file cr-15-233-s001.pdf]

## Supplementary Material

### Suppl 1. Search strategy for Embase (via OvidSP)

| Database: Embase <1974 to 2022 September 16> |                                                                                                         |          |
|----------------------------------------------|---------------------------------------------------------------------------------------------------------|----------|
| Search executed: September 19, 2022          |                                                                                                         |          |
| #                                            | String                                                                                                  | Results  |
| 1                                            | exp congestive cardiomyopathy/                                                                          | 36077    |
| 2                                            | ((dilated or dilation or congestive or ischemic or primary or idiopathic) adj2 cardiomyopath*).ti,ab.   | 43350    |
| 3                                            | or/1-2                                                                                                  | 56105    |
| 4                                            | (mutat* or geneti* or variant* or polymorphism* or famil* or inherit* or heredit*).ti,ab.               | 3884074  |
| 5                                            | exp epidemiology/                                                                                       | 4142201  |
| 6                                            | epidemiolog*.ti,ab.                                                                                     | 540852   |
| 7                                            | exp incidence/                                                                                          | 614101   |
| 8                                            | (incidence or risk).ti,ab.                                                                              | 4485067  |
| 9                                            | exp prevalence/                                                                                         | 911177   |
| 10                                           | prevalence.ti,ab.                                                                                       | 1053840  |
| 11                                           | or/5-10                                                                                                 | 7410818  |
| 12                                           | and/3-4,11                                                                                              | 3229     |
| 13                                           | (conference or conference abstract or conference paper or conference review).pt.                        | 5312508  |
| 14                                           | limit 13 to yr="2020-current"                                                                           | 723969   |
| 15                                           | 13 not 14                                                                                               | 4588539  |
| 16                                           | (exp animal/ or nonhuman/) not exp human/                                                               | 6890733  |
| 17                                           | (book or chapter or editorial or erratum or letter or note or short survey or tombstone or comment).pt. | 3565361  |
| 18                                           | Case Study/                                                                                             | 88164    |
| 19                                           | case report.tw.                                                                                         | 498170   |
| 20                                           | or/15-19                                                                                                | 14772830 |
| 21                                           | 12 not 20                                                                                               | 1954     |
| 22                                           | limit 21 to english                                                                                     | 1807     |
| 23                                           | remove duplicates from 22                                                                               | 1781     |
