# Supplementary material for: Prevalence of Genetically Associated Dilated Cardiomyopathy: A Systematic Literature Review and Meta-Analysis
Source: PubMed Central journal article supplement — Cardiol Res. 2024 Aug 15;15(4):233–45. doi: 10.14740/cr1680 (PMC11349141; doi:10.14740/cr1680), 2024-08-15
Supplement: cr-15-233-s002.pdf [file cr-15-233-s002.pdf]

**Suppl 2.** Search strategy for MEDLINE® (via OvidSP)

| <b>Database: Ovid MEDLINE(R) ALL &lt;1946 to September 16, 2022&gt;</b> |                                                                                                         |                |
|-------------------------------------------------------------------------|---------------------------------------------------------------------------------------------------------|----------------|
| <b>Search executed: Executed on September 19, 2022</b>                  |                                                                                                         |                |
| <b>#</b>                                                                | <b>String</b>                                                                                           | <b>Results</b> |
| 1                                                                       | exp Cardiomyopathy, Dilated/                                                                            | 16873          |
| 2                                                                       | ((dilata* or dilation or congestive or ischemic or primary or idiopathic) adj2 cardiomyopath*).ti,ab.   | 25452          |
| 3                                                                       | or/1-2                                                                                                  | 30495          |
| 4                                                                       | (mutat* or geneti* or variant* or polymorphism* or famil* or inherit* or heredit*).ti,ab.               | 3099503        |
| 5                                                                       | exp Epidemiology/                                                                                       | 28205          |
| 6                                                                       | epidemiolog*.ti,ab.                                                                                     | 428116         |
| 7                                                                       | exp Incidence/                                                                                          | 295537         |
| 8                                                                       | (incidence or "positivity rate*" or "attack rate*" or risk).ti,ab.                                      | 3132730        |
| 9                                                                       | exp Prevalence/                                                                                         | 334715         |
| 10                                                                      | prevalence.ti,ab.                                                                                       | 742427         |
| 11                                                                      | or/5-10                                                                                                 | 3933575        |
| 12                                                                      | and/3-4,11                                                                                              | 1206           |
| 13                                                                      | (exp animal/ or nonhuman/) not exp human/                                                               | 5047902        |
| 14                                                                      | (book or chapter or editorial or erratum or letter or note or short survey or tombstone or comment).pt. | 2095860        |
| 15                                                                      | Case Study/                                                                                             | 2291552        |
| 16                                                                      | case report.tw.                                                                                         | 372352         |
| <b>Database: Ovid MEDLINE(R) ALL &lt;1946 to September 16, 2022&gt;</b> |                                                                                                         |                |
| <b>Search executed: Executed on September 19, 2022</b>                  |                                                                                                         |                |
| <b>#</b>                                                                | <b>String</b>                                                                                           | <b>Results</b> |
| 17                                                                      | or/13-16                                                                                                | 9155338        |
| 18                                                                      | 12 not 17                                                                                               | 1028           |
| 19                                                                      | limit 18 to english                                                                                     | 940            |
| 20                                                                      | remove duplicates from 19                                                                               | 939            |
