# Supplementary material for: Prevalence of Genetically Associated Dilated Cardiomyopathy: A Systematic Literature Review and Meta-Analysis
Source: PubMed Central journal article supplement — Cardiol Res. 2024 Aug 15;15(4):233–45. doi: 10.14740/cr1680 (PMC11349141; doi:10.14740/cr1680), 2024-08-15
Supplement: cr-15-233-s003.pdf [file cr-15-233-s003.pdf]

**Suppl 3. List of studies included in the review**

| <b>First Author &amp; Year; Country</b>                                                   | <b>Title</b>                                                                                                                                                   |
|-------------------------------------------------------------------------------------------|----------------------------------------------------------------------------------------------------------------------------------------------------------------|
| Akinrinade 2015; Finland                                                                  | Genetics and genotype-phenotype correlations in Finnish patients with dilated cardiomyopathy                                                                   |
| Alimohamed 2021; Netherlands                                                              | Diagnostic yield of targeted next generation sequencing in 2002 Dutch cardiomyopathy patients                                                                  |
| Anderson 2020; USA                                                                        | Discovery of TITIN Gene Truncating Variant Mutations and 5-Year Outcomes in Patients With Nonischemic Dilated Cardiomyopathy                                   |
| Aragam 2021; UK                                                                           | Combined assessments of monogenic and polygenic risk for dilated cardiomyopathy                                                                                |
| Cannata 2020; Multinational; USA, UK, Italy                                               | The late-onset dilated cardiomyopathy                                                                                                                          |
| Cannata 2022; Multinational; Italy, USA, Australia, UK                                    | Association of Titin Variations with Late-Onset Dilated Cardiomyopathy                                                                                         |
| Cannic 2020; UK                                                                           | The influence of age on the diagnostic yield of genetic testing in dilated cardiomyopathy                                                                      |
| Chami 2014; Canada                                                                        | Nonsense Mutations in BAG3 are Associated With Early-Onset Dilated Cardiomyopathy in French Canadians                                                          |
| Daehmlow 2002; Germany                                                                    | Novel mutations in sarcomeric protein genes in dilated cardiomyopathy                                                                                          |
| Dal Ferro 2017; Italy                                                                     | Association between mutation status and left ventricular reverse remodelling in dilated cardiomyopathy                                                         |
| Dalin 2017; Sweden                                                                        | Massive parallel sequencing questions the pathogenic role of missense variants in dilated cardiomyopathy                                                       |
| Escobar-Lopez 2021; Spain                                                                 | Association of Genetic Variants With Outcomes in Patients With Nonischemic Dilated Cardiomyopathy                                                              |
| Fatkin 2016; Multinational; Australia, USA, UK                                            | Titin truncating mutations: A rare cause of dilated cardiomyopathy in the young                                                                                |
| Franaszczyk 2017; Poland                                                                  | Titin truncating variants in dilated cardiomyopathy - Prevalence and genotype-phenotype correlations                                                           |
| Gigli 2019; Multinational; Italy, USA                                                     | Genetic Risk of Arrhythmic Phenotypes in Patients With Dilated Cardiomyopathy                                                                                  |
| Haas 2015; Multinational; Denmark, Sweden, France, Italy, Germany, UK, Netherlands, Spain | Atlas of the clinical genetics of human dilated cardiomyopathy                                                                                                 |
| Haggerty 2019; USA                                                                        | Genomics-First Evaluation of Heart Disease Associated With Titin-Truncating Variants                                                                           |
| Hazebroek 2018; Netherlands                                                               | Prevalence of Pathogenic Gene Mutations and Prognosis Do Not Differ in Isolated Left Ventricular Dysfunction Compared With Dilated Cardiomyopathy              |
| Helio 2020; Multinational; 18 European countries                                          | ESC EORP Cardiomyopathy Registry: real-life practice of genetic counselling and testing in adult cardiomyopathy patients                                       |
| Herkert 2020; Netherlands                                                                 | Utility of genetics for risk stratification in paediatric dilated cardiomyopathy                                                                               |
| Herman 2012; UK                                                                           | Truncations of Titin Causing Dilated Cardiomyopathy                                                                                                            |
| Hershberger 2008; USA                                                                     | Coding sequence mutations identified in MYH7, TNNT2, SCN5A, CSRP3, LBD3, and TCAP from 313 patients with familial or idiopathic dilated cardiomyopathy.        |
| Janin 2017; France                                                                        | Truncating mutations on myofibrillar myopathies causing genes as prevalent molecular explanations on patients with dilated cardiomyopathy                      |
| Kindel 2012; USA                                                                          | Pediatric cardiomyopathy: Importance of genetic and metabolic evaluation                                                                                       |
| Klauke 2017; Germany                                                                      | High proportion of genetic cases in patients with advanced cardiomyopathy including a novel homozygous Plakophilin 2-gene mutation.                            |
| Lakdawala 2012; USA                                                                       | Genetic Testing for Dilated Cardiomyopathy in Clinical Practice                                                                                                |
| Lemenager 2020; French Guiana                                                             | Aetiological and morphological spectrum of cardiomyopathies in French Guiana: A retrospective study                                                            |
| Mazzarotto 2020; Multinational; UK, Singapore                                             | Reevaluating the Genetic Contribution of Monogenic Dilated Cardiomyopathy                                                                                      |
| Millat 2011; France                                                                       | Clinical and mutational spectrum in a cohort of 105 unrelated patients with dilated cardiomyopathy                                                             |
| Nguyen 2021; Vietnam                                                                      | Genetic determinants and genotype-phenotype correlations in vietnamese patients with dilated cardiomyopathy                                                    |
| Parrott 2020; USA                                                                         | Investigation of de novo variation in pediatric cardiomyopathy                                                                                                 |
| Pena-Pena 2020; Spain                                                                     | Prognostic implications of pathogenic truncating variants in the TTN gene                                                                                      |
| Pugh 2014; USA                                                                            | The landscape of genetic variation in dilated cardiomyopathy as surveyed by clinical DNA sequencing                                                            |
| Ramchand 2020; Australia                                                                  | Prospective Evaluation of the Utility of Whole Exome Sequencing in Dilated Cardiomyopathy                                                                      |
| Roberts 2015; USA                                                                         | Integrated allelic, transcriptional, and phenomic dissection of the cardiac effects of titin truncations in health and disease                                 |
| Shah 2022; UK                                                                             | Frequency, Penetrance, and Variable Expressivity of Dilated Cardiomyopathy-Associated Putative Pathogenic Gene Variants in UK Biobank Participants             |
| Shen 2022; China                                                                          | Genetic variants in Chinese patients with sporadic dilated cardiomyopathy: a cross-sectional study                                                             |
| Shimizu 2005; Japan                                                                       | Gene mutations in adult Japanese patients with dilated cardiomyopathy                                                                                          |
| Sousa 2019; Portugal                                                                      | Molecular characterization of Portuguese patients with dilated cardiomyopathy                                                                                  |
| Stava 2022; Norway                                                                        | Molecular genetics in 4 408 cardiomyopathy probands and 3 008 relatives in Norway: 17 years of genetic testing in a national laboratory                        |
| Stroeks 2021; Netherlands                                                                 | Clinical impact of re-evaluating genes and variants implicated in dilated cardiomyopathy                                                                       |
| Tayal 2017; UK                                                                            | Phenotype and Clinical Outcomes of Titin Cardiomyopathy                                                                                                        |
| Tobita 2018; Japan                                                                        | Genetic basis of cardiomyopathy and the genotypes involved in prognosis and left ventricular reverse re modeling                                               |
| Trachoo 2022; Thailand                                                                    | Molecular genetic testing for hypertrophic and dilated cardiomyopathy in inherited cardiovascular condition genetics service: lessons from a Thai cohort       |
| Van Leeuw 2020; Belgium                                                                   | Prevalence and nature of genetic mutations identified in patients with cardiac diseases referred to a specialised consultation                                 |
| Van Spaendonck-Zwarts 2013; Netherlands                                                   | Genetic analysis in 418 index patients with idiopathic dilated cardiomyopathy: Overview of 10 years' experience                                                |
| Verdonschot 2020; Netherlands                                                             | Implications of genetic testing in dilated cardiomyopathy                                                                                                      |
| Villard 2005; France                                                                      | Mutation screening in dilated cardiomyopathy: prominent role of the beta myosin heavy chain gene                                                               |
| Vissing 2021; Denmark                                                                     | Family screening in dilated cardiomyopathy; long-term incidence and potential for limiting follow-up                                                           |
| Waldmüller 2011; Germany                                                                  | Novel correlations between the genotype and the phenotype of hypertrophic and dilated cardiomyopathy: Results from the German Competence Network Heart Failure |
| Walsh 2016; UK                                                                            | Reassessment of Mendelian gene pathogenicity using 7,855 cardiomyopathy cases and 60,706 reference samples                                                     |
| Wang 2022; China                                                                          | Next-Generation Sequencing Reveals Novel Genetic Variants for Dilated Cardiomyopathy in Pediatric Chinese Patients                                             |
| Ware 2018; Multinational; Spain, UK                                                       | Genetic Etiology for Alcohol-Induced Cardiac Toxicity                                                                                                          |
| Xiao 2022; China                                                                          | Whole-exome sequencing reveals genetic risks of early-onset sporadic dilated cardiomyopathy in the Chinese Han population                                      |
| Zaklyazminskaya 2019; Russia                                                              | Low mutation rate in the TTN gene in paediatric patients with dilated cardiomyopathy - a pilot study                                                           |
| Zhang 2020; China                                                                         | Genetic basis and genotype-phenotype correlations in Han Chinese patients with idiopathic dilated cardiomyopathy                                               |
| Zhao 2015; China                                                                          | Targeted next-generation sequencing of candidate genes reveals novel mutations in patients with dilated cardiomyopathy                                         |

Abbreviations – UK: United Kingdom; USA: United States of America.
