# Supplementary material for: Prevalence of Genetically Associated Dilated Cardiomyopathy: A Systematic Literature Review and Meta-Analysis
Source: PubMed Central journal article supplement — Cardiol Res. 2024 Aug 15;15(4):233–45. doi: 10.14740/cr1680 (PMC11349141; doi:10.14740/cr1680), 2024-08-15
Supplement: cr-15-233-s004.pdf [file cr-15-233-s004.pdf]

**Suppl 4.** List of excluded studies after full-text screening

| <b>First Author &amp; Year</b> | <b>Title</b>                                                                                                                                                                            | <b>Reason for Exclusion</b> |
|--------------------------------|-----------------------------------------------------------------------------------------------------------------------------------------------------------------------------------------|-----------------------------|
| Bailly 2019                    | Role of family history and clinical screening in the identification of families with idiopathic dilated cardiomyopathy in Johannesburg, South Africa                                    | Family history              |
| Gimeno 2009                    | Penetrance and Risk Profile in Inherited Cardiac Diseases Studied in a Dedicated Screening Clinic                                                                                       | Family history              |
| Goerss 1995                    | Frequency of familial dilated cardiomyopathy                                                                                                                                            | Family history              |
| Huggins 2022                   | Prevalence and Cumulative Risk of Familial Idiopathic Dilated Cardiomyopathy                                                                                                            | Family history              |
| Marume 2020                    | Prognosis and clinical characteristics of dilated cardiomyopathy with family history via pedigree analysis                                                                              | Family history              |
| Michels 1991                   | The frequency of familial dilated cardiomyopathy in a series of patients with idiopathic dilated cardiomyopathy                                                                         | Family history              |
| Monserrat 2002                 | Familial dilated cardiomyopathy in patients transplanted for idiopathic dilated cardiomyopathy                                                                                          | Family history              |
| Venugopalan 2001               | Low proportion of familial dilated cardiomyopathy in an Arab population with a high prevalence of consanguineous marriages                                                              | Family history              |
| Akinrinade 2015                | Prevalence of titin truncating variants in general population                                                                                                                           | Outcomes                    |
| Andreasen 2013                 | New population-based exome data are questioning the pathogenicity of previously cardiomyopathy-associated genetic variants                                                              | Outcomes                    |
| Bourfiss 2022                  | Prevalence and disease expression of pathogenic and likely pathogenic variants associated with inherited cardiomyopathies in the general population                                     | Outcomes                    |
| Cannata 2021                   | Titin mutations and female sex characterize dilated cardiomyopathy in the elderly                                                                                                       | Outcomes                    |
| Golbus 2012                    | Population-based variation in cardiomyopathy genes                                                                                                                                      | Outcomes                    |
| Mahmood 2022                   | Disease Penetrance in Asymptomatic Carriers of Familial Cardiomyopathy Variants                                                                                                         | Outcomes                    |
| Nallari 2009                   | Epidemiology and genetics of dilated cardiomyopathy in the Indian context                                                                                                               | Outcomes                    |
| Nouhravesh 2016                | Analyses of more than 60,000 exomes questions the role of numerous genes previously associated with dilated cardiomyopathy                                                              | Outcomes                    |
| Paldino 2021                   | CLINICAL MANIFESTATION and PROGNOSIS of DIFFERENT CARDIOMYOPATHY TYPES on the BASIS of GENETIC BACKGROUND                                                                               | Outcomes                    |
| Vaikhanskaya 2020              | Comparative genetic, clinical features, and 5-years outcomes for dilated vs noncompaction cardiomyopathy                                                                                | Outcomes                    |
| Andrews 2008                   | New-onset heart failure due to heart muscle disease in childhood: A prospective study in the United Kingdom and Ireland                                                                 | Population                  |
| Bick 2012                      | Burden of rare sarcomere gene variants in the Framingham and Jackson Heart study cohorts                                                                                                | Population                  |
| Keren 1988                     | Features of mildly dilated congestive cardiomyopathy compared with idiopathic restrictive cardiomyopathy and typical dilated cardiomyopathy                                             | Population                  |
| Pasotti 2008                   | Long-Term Outcome and Risk Stratification in Dilated Cardiomyopathies                                                                                                                   | Population                  |
| Seidelmann 2016                | Familial dilated cardiomyopathy diagnosis is commonly overlooked at the time of transplant listing                                                                                      | Population                  |
| Seliem 2007                    | Influence of consanguinity on the pattern of familial aggregation of congenital cardiovascular anomalies in an outpatient population: Studies from the Eastern Province of Saudi Arabia | Population                  |
| van Waning 2019                | Cardiac Phenotypes, Genetics, and Risks in Familial Noncompaction Cardiomyopathy                                                                                                        | Population                  |
| Yeh 2019                       | Targeted next generation sequencing for genetic mutations of dilated cardiomyopathy                                                                                                     | Population                  |
| Yin 2015                       | Association of the LMNA gene single nucleotide polymorphism rs4641 with dilated cardiomyopathy                                                                                          | Population                  |
| Zhao 2015                      | Targeted Next-Generation Sequencing Reveals Hot Spots and Doubly Heterozygous Mutations in Chinese Patients with Familial Cardiomyopathy                                                | Study design                |
| Akinrinade 2016                | Relevance of truncating titin mutations in dilated cardiomyopathy                                                                                                                       | Other                       |
| Pena-Pena 2021                 | Clinical utility of genetic testing in patients with dilated cardiomyopathy                                                                                                             | Other                       |
| Ware 2016                      | Shared genetic predisposition in Peripartum and dilated cardiomyopathies                                                                                                                | Other                       |
